# Supplementary material for: Identification of an orally active small-molecule PTHR1 agonist for the treatment of hypoparathyroidism
Source: PubMed Central journal article supplement (PMC5120204; doi:10.1038/ncomms13384), 2016-11-18
Supplement: ncomms13384-s1.pdf [file ncomms13384-s1.pdf]

**a**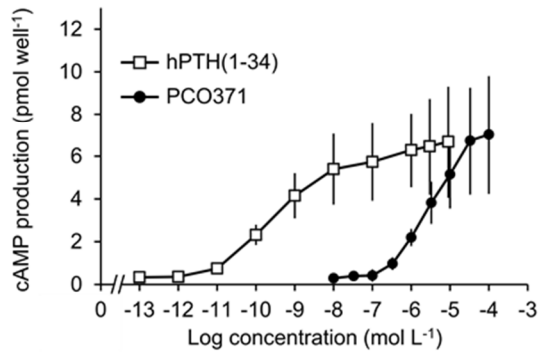**b**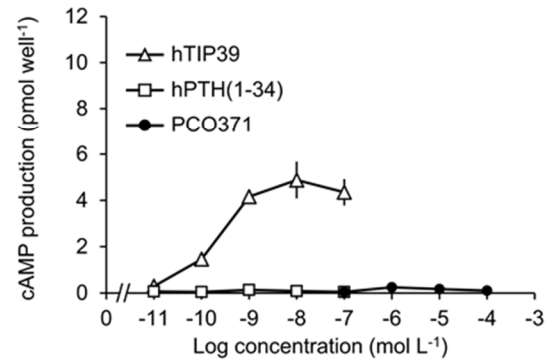

**Supplementary Figure 1. Reactivity of PCO371 to rat PTHR1 and PTHR2.** (a) cAMP production by hPTH(1-34) and PCO371 in COS-7 cells expressing rat PTHR1. (b) cAMP production by hPTH(1-34), PCO371, and hTIP39 in COS-7 cells expressing rat PTHR2. Data are represented as the mean  $\pm$  s.d. of one experiment ( $n=3$ ).

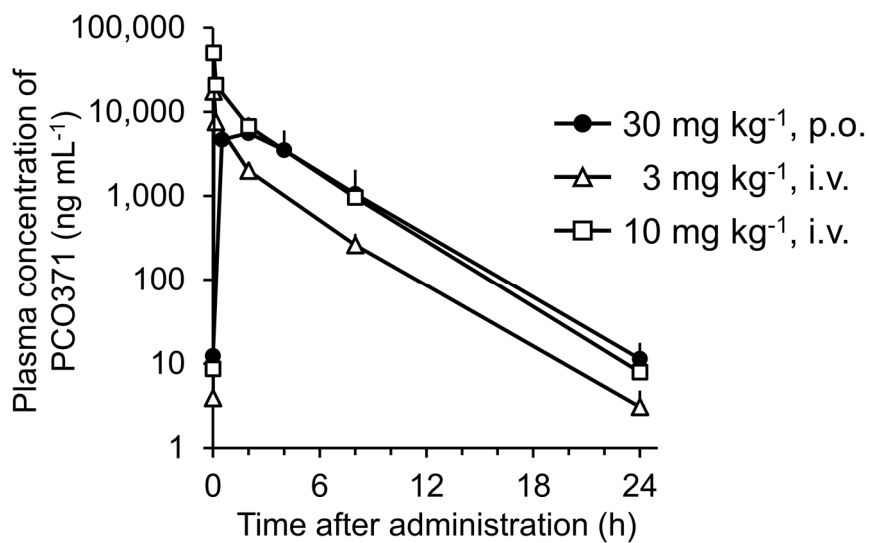

**Supplementary Figure 2. Pharmacokinetic profile of PCO371 in OVX rats.** OVX rats were treated with a single oral (30 mg kg<sup>-1</sup>) or intravenous (3 or 10 mg kg<sup>-1</sup>) administration of PCO371. Data are represented as the mean + s.d. of one experiment ( $n=11$  for 3 and 30 mg kg<sup>-1</sup> PCO371,  $n=12$  for 10 mg kg<sup>-1</sup> PCO371). Additional pharmacokinetics parameters are described in **Supplementary Table 2.**

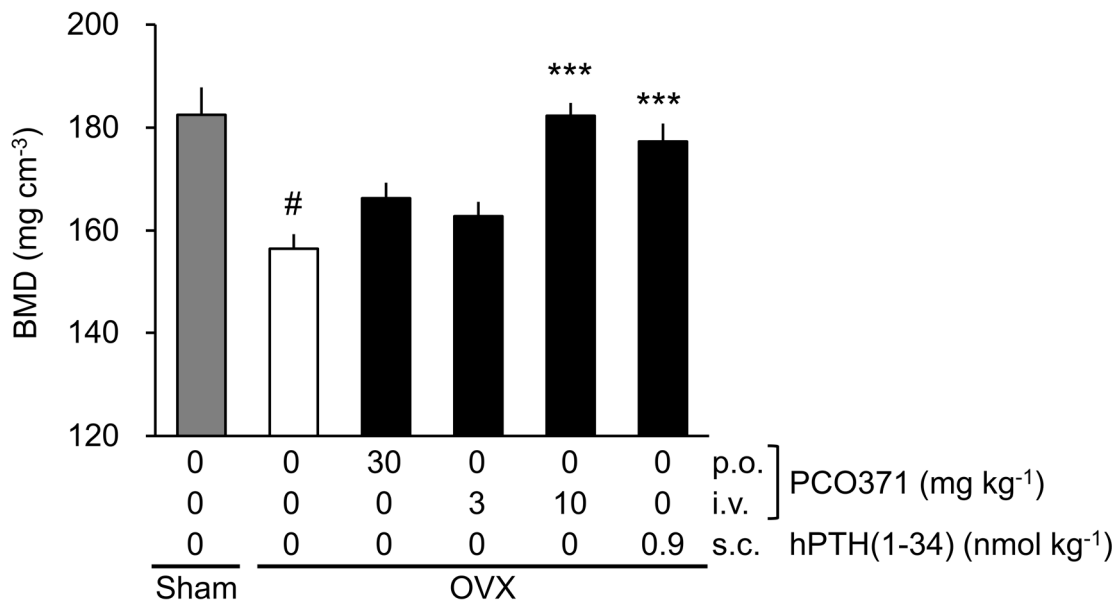

**Supplementary Figure 3. BMD of the total femur of OVX rats.** Rats were treated once-daily with PCO371 (p.o.) or hPTH(1-34) (s.c.) for 12 weeks commencing at 12 weeks after OVX surgery. Data are represented as the mean + s.e.m. of one experiment [ $n=9$  for Sham,  $n=12$  for Vehicle and hPTH(1-34),  $n=10$  for 10 mg kg<sup>-1</sup> PCO371,  $n=11$  for 3 and 30 mg kg<sup>-1</sup> PCO371]. Student's *t*-test was used to compare the sham and OVX vehicle-treated groups; #:  $P<0.05$ . Parametric Dunnett's test was used to compare PCO371- or hPTH(1-34)-treated groups with the OVX vehicle-treated group; \*:  $P<0.05$ , \*\*:  $P<0.01$ , \*\*\*:  $P<0.001$ .

**a**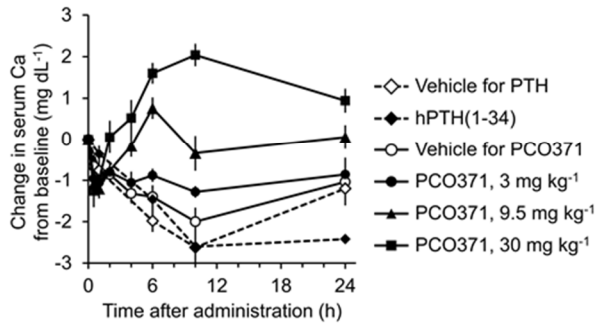**b**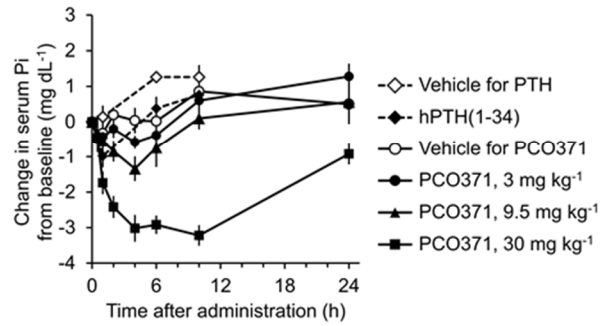**c**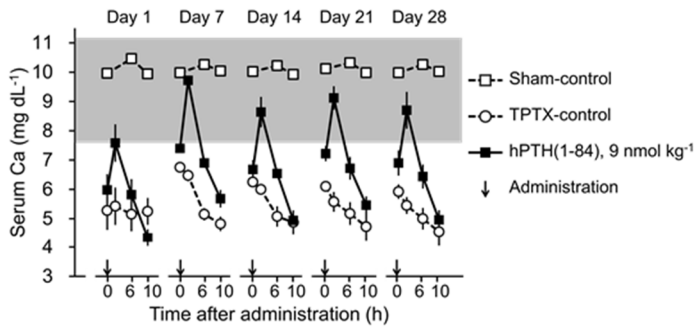**d**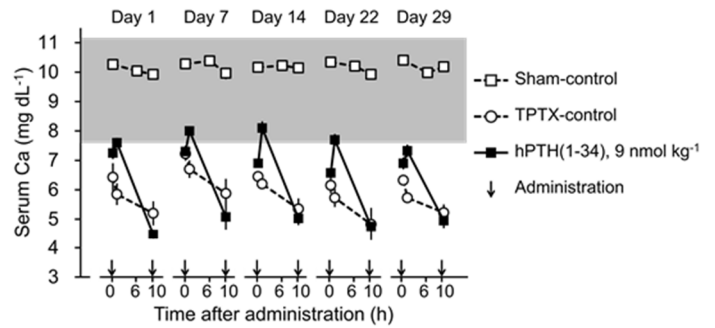**e**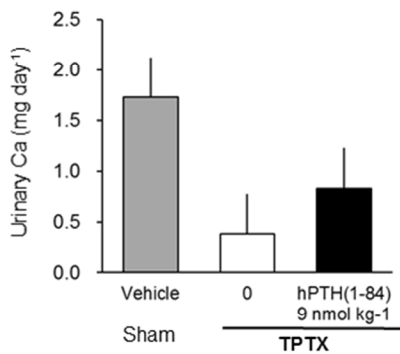**f**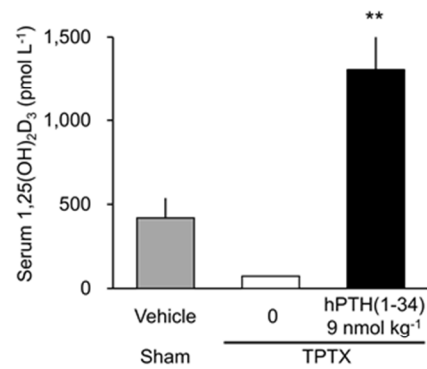**g**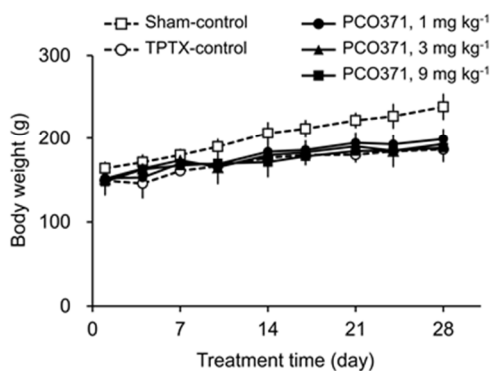

**Supplementary Figure 4. Effects of PCO371 on serum parameters in TPTX rats. (a,b)**

Calcemic (a) and hypophosphatemic (b) effects of oral PCO371 in single administration or in single twice-daily subcutaneous treatment with hPTH(1–34) ( $n=5$  for each dose). (c,d) Changes in serum Ca level after once-daily subcutaneous treatment (arrows) with hPTH(1–84) ( $n=5$  for Sham and  $9 \text{ nmol kg}^{-1}$  hPTH(1–84),  $n=4$  for TPTX-control) (c) and twice-daily subcutaneous treatment (arrows) with hPTH(1–34) ( $n=5$  for Sham,  $n=4$  for TPTX control and  $9 \text{ nmol kg}^{-1}$  hPTH(1–34)) (d), with shaded areas showing the target therapeutic range ( $7.6\text{--}11.2 \text{ mg dL}^{-1}$ ) of serum Ca. (e) Urinary Ca excretion in TPTX rats after once-daily administration of hPTH(1–84) for 4 weeks ( $n=5$  for Sham and  $9 \text{ nmol kg}^{-1}$  hPTH(1–84),  $n=4$  for TPTX control). (f) Levels of  $1,25(\text{OH})_2\text{D}_3$  in serum after twice-daily administration of hPTH(1–34) for 4 weeks ( $n=5$  for Sham,  $n=3$  for TPTX control,  $n=4$  for  $9 \text{ nmol kg}^{-1}$  hPTH(1–34)). (g) Changes in body weight in TPTX rats treated twice-daily with oral PCO371 for 4 weeks ( $n=5$  for each dose). Data are represented as the mean  $\pm$  s.e.m. of one experiment. Student's t-test was used to compare the TPTX vehicle-treated groups with the hPTH(1–34)-treated group; \*\*:  $P<0.01$ .

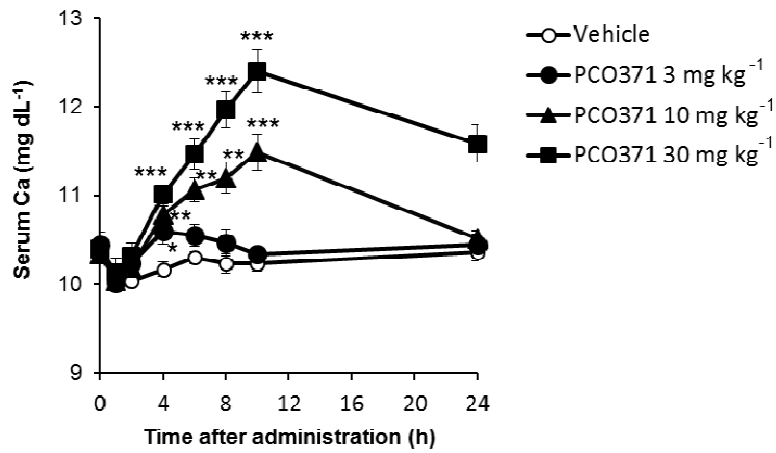

**Supplementary Figure 5. Calcemic effect of PCO371 in normal dogs.** Time course changes in serum Ca levels in normal dogs after single oral administration of PCO371 ( $n=6$  for each dose). Data are represented as the mean  $\pm$  s.e.m. of one experiment. Dunnett's test was used to compare the vehicle-treated groups with the PCO371-treated groups. \*:  $P<0.05$ , \*\*:  $P<0.01$ , \*\*\*:  $P<0.001$ .

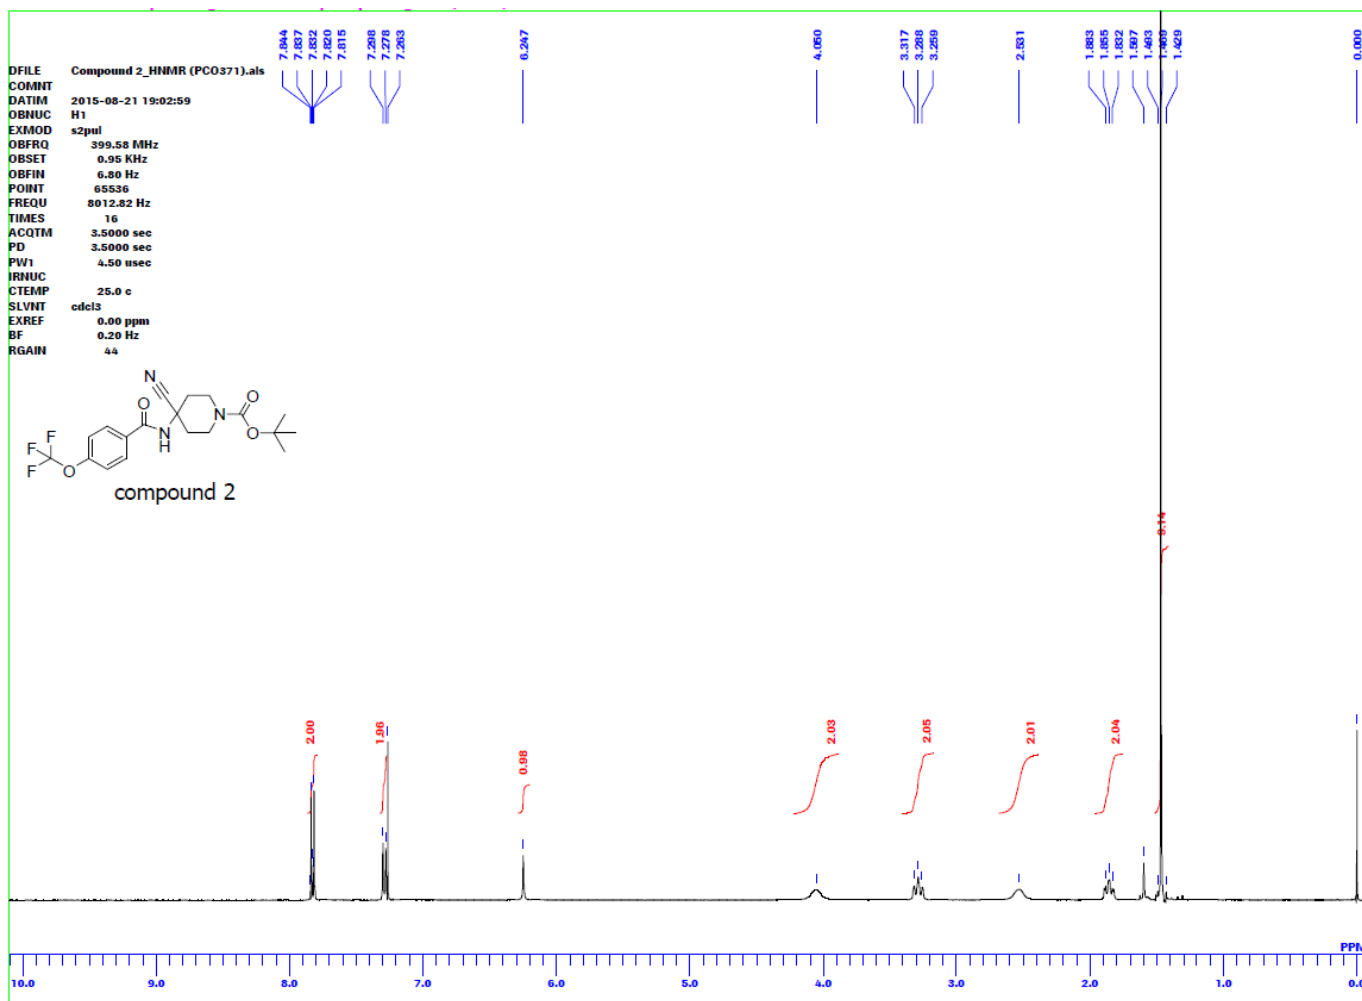

Supplementary Figure 6.  $^1\text{H-NMR}$  (400 MHz,  $\text{CDCl}_3$ ) spectrum of compound 2.

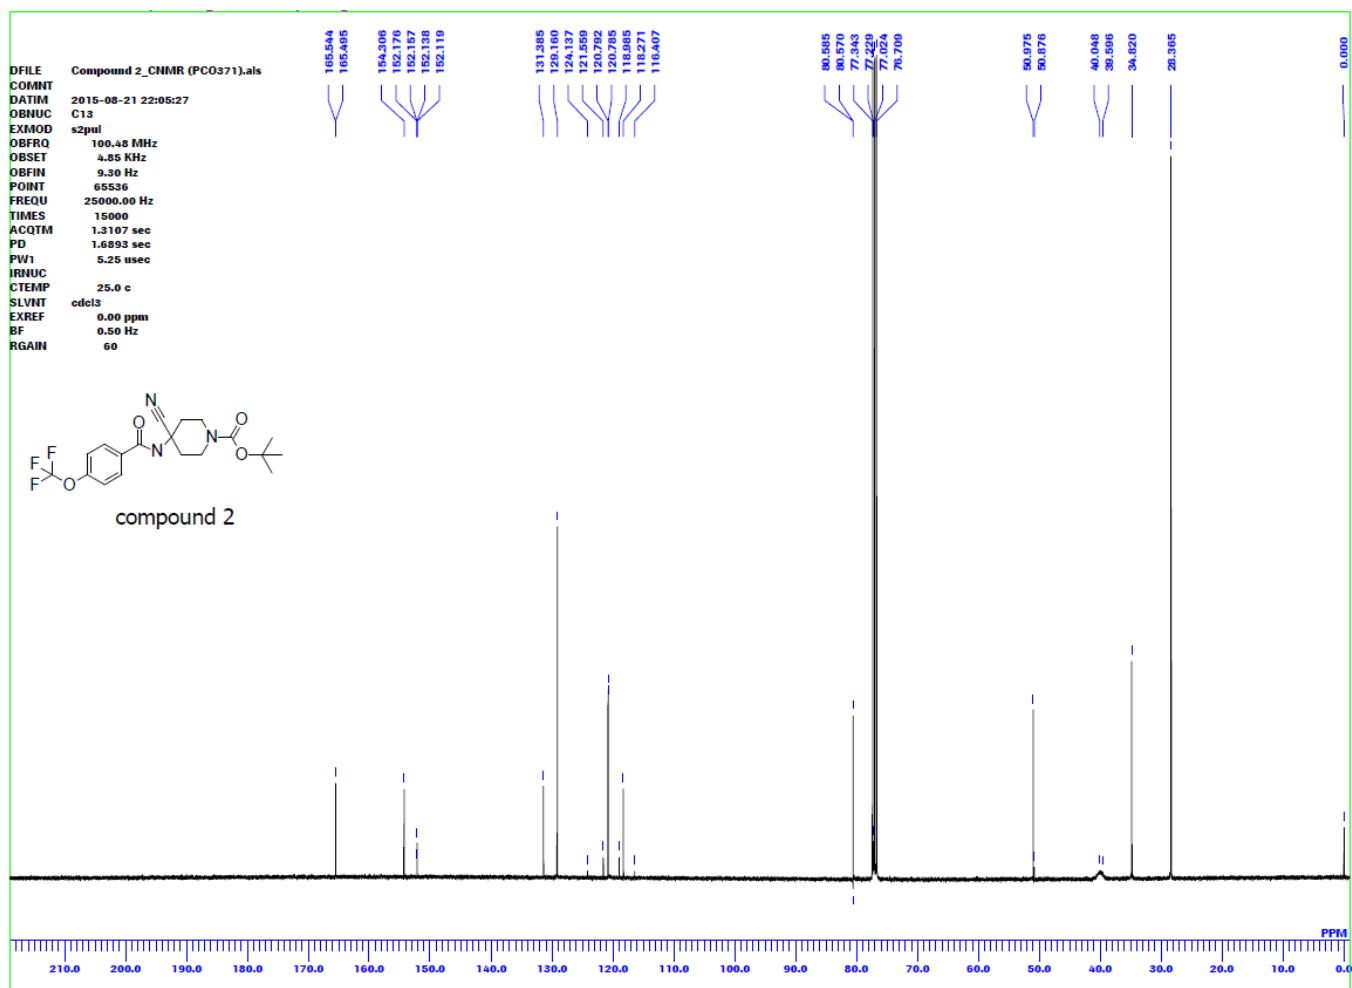

Supplementary Figure 7.  $^{13}\text{C}$ -NMR (100 MHz,  $\text{CDCl}_3$ ) spectrum of compound 2.



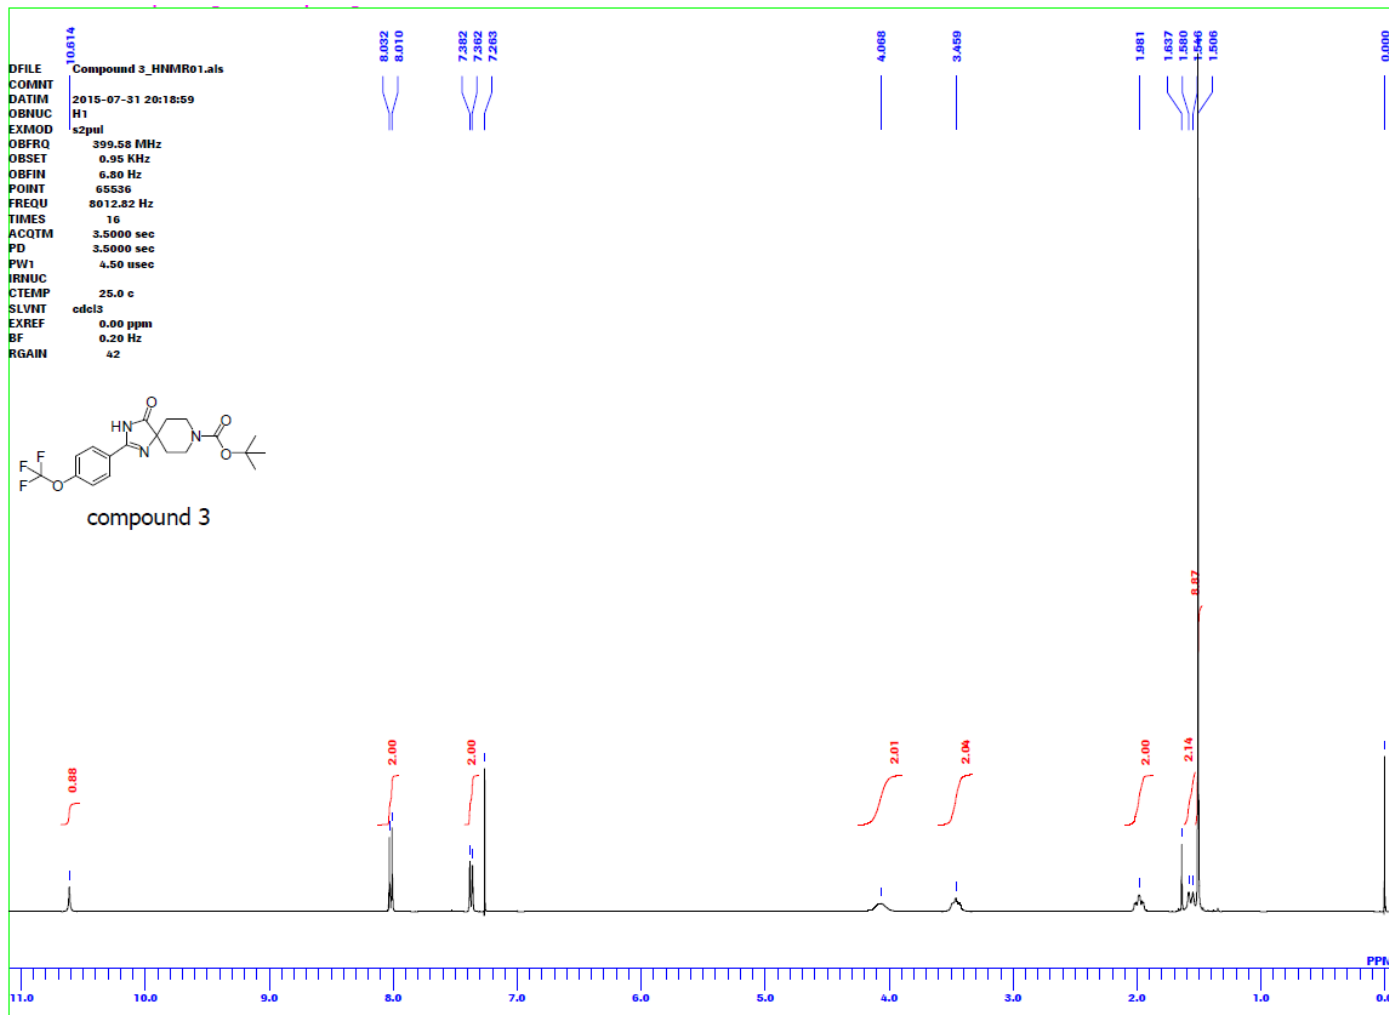

Supplementary Figure 8.  $^1\text{H-NMR}$  (400 MHz,  $\text{CDCl}_3$ ) spectrum of compound 3.

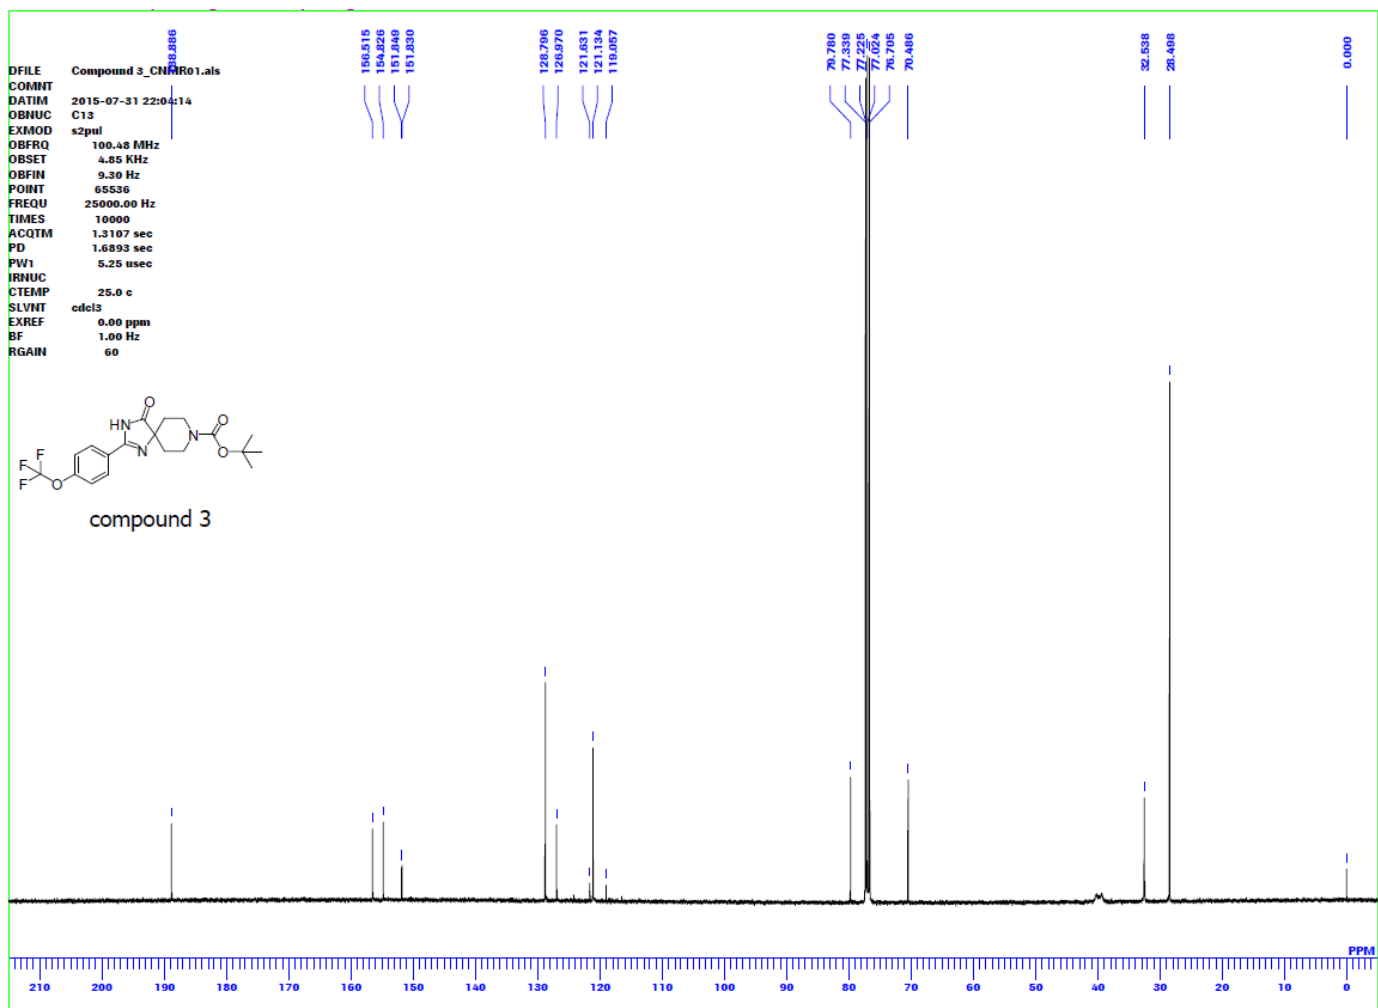

Supplementary Figure 9.  $^{13}\text{C}$ -NMR (100 MHz,  $\text{CDCl}_3$ ) spectrum of compound 3.

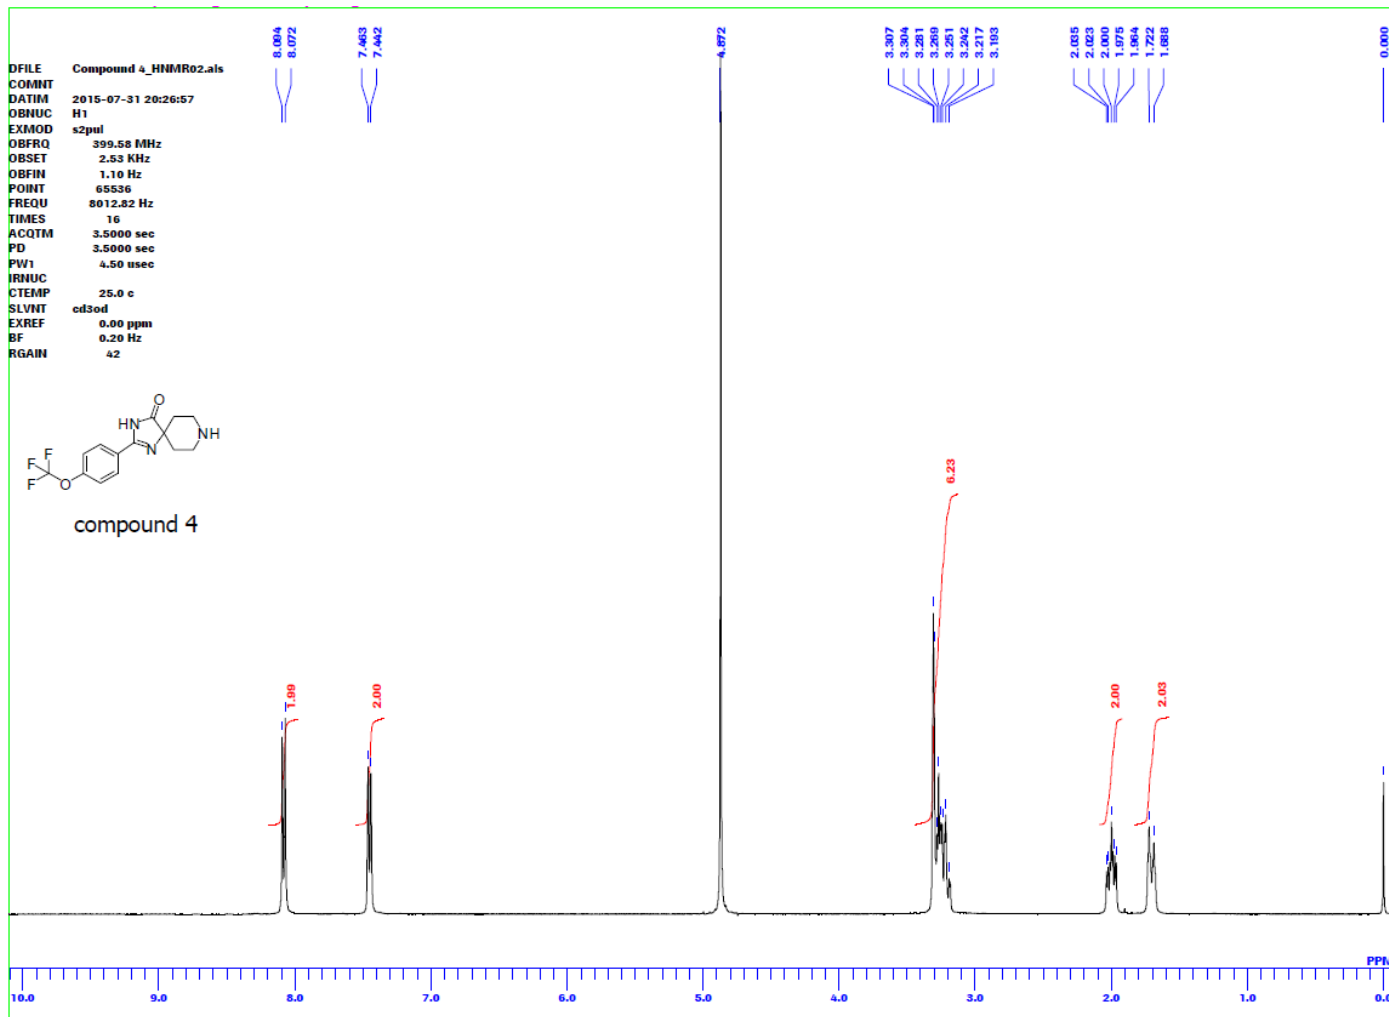

Supplementary Figure 10.  $^1\text{H-NMR}$  (400 MHz,  $\text{CD}_3\text{OD}$ ) spectrum of compound 4.

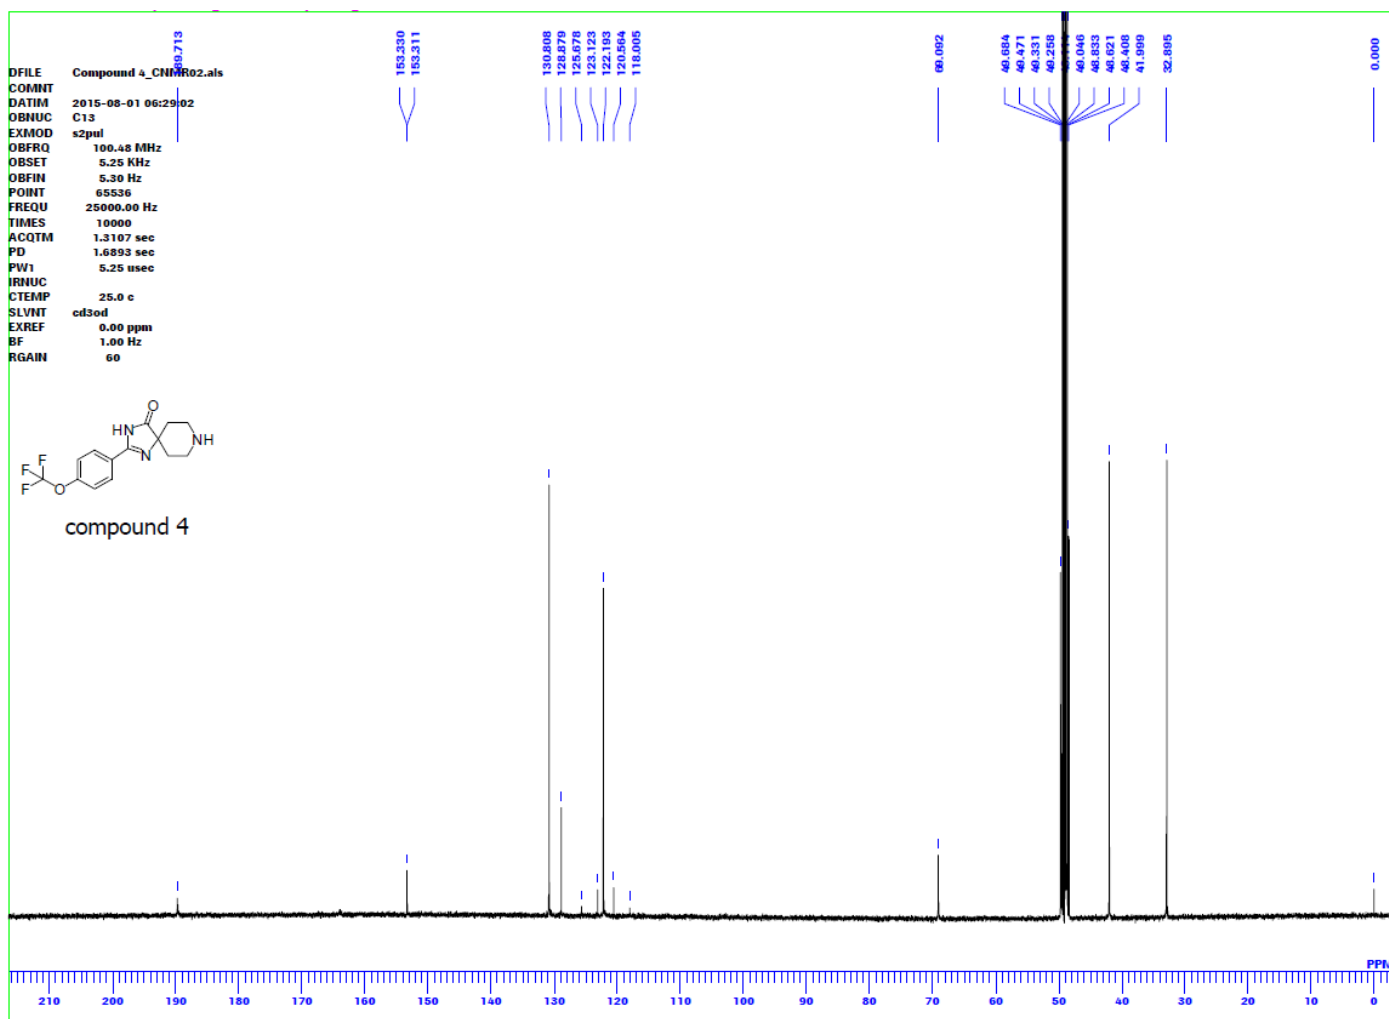

Supplementary Figure 11.  $^{13}\text{C}$ -NMR (100 MHz,  $\text{CD}_3\text{OD}$ ) spectrum of compound 4.

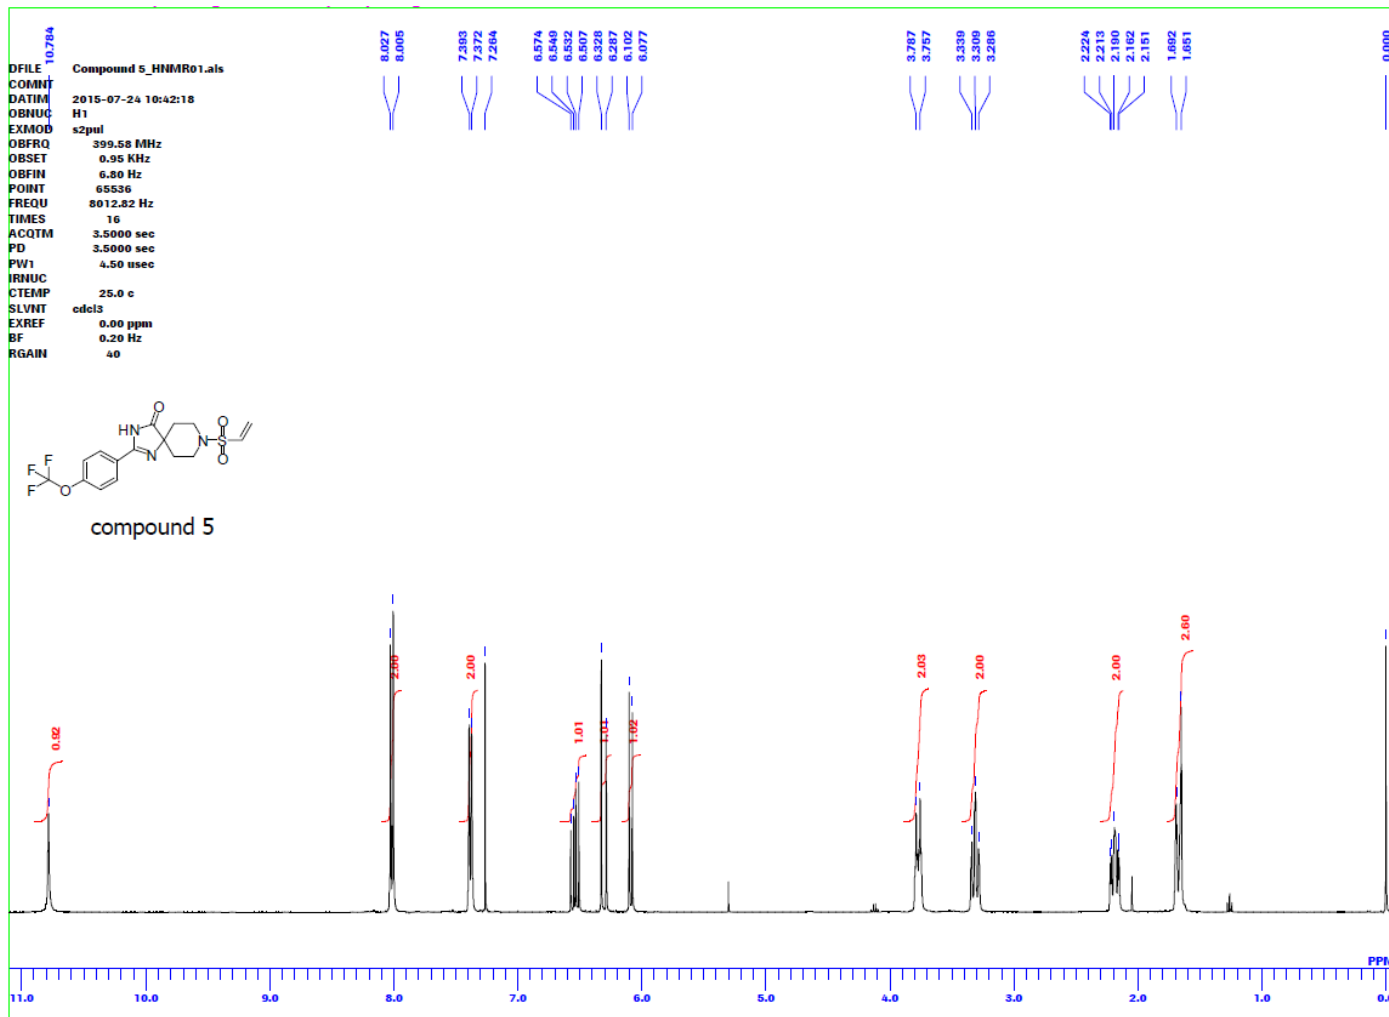

Supplementary Figure 12.  $^1\text{H-NMR}$  (400 MHz,  $\text{CDCl}_3$ ) spectrum of compound 5.

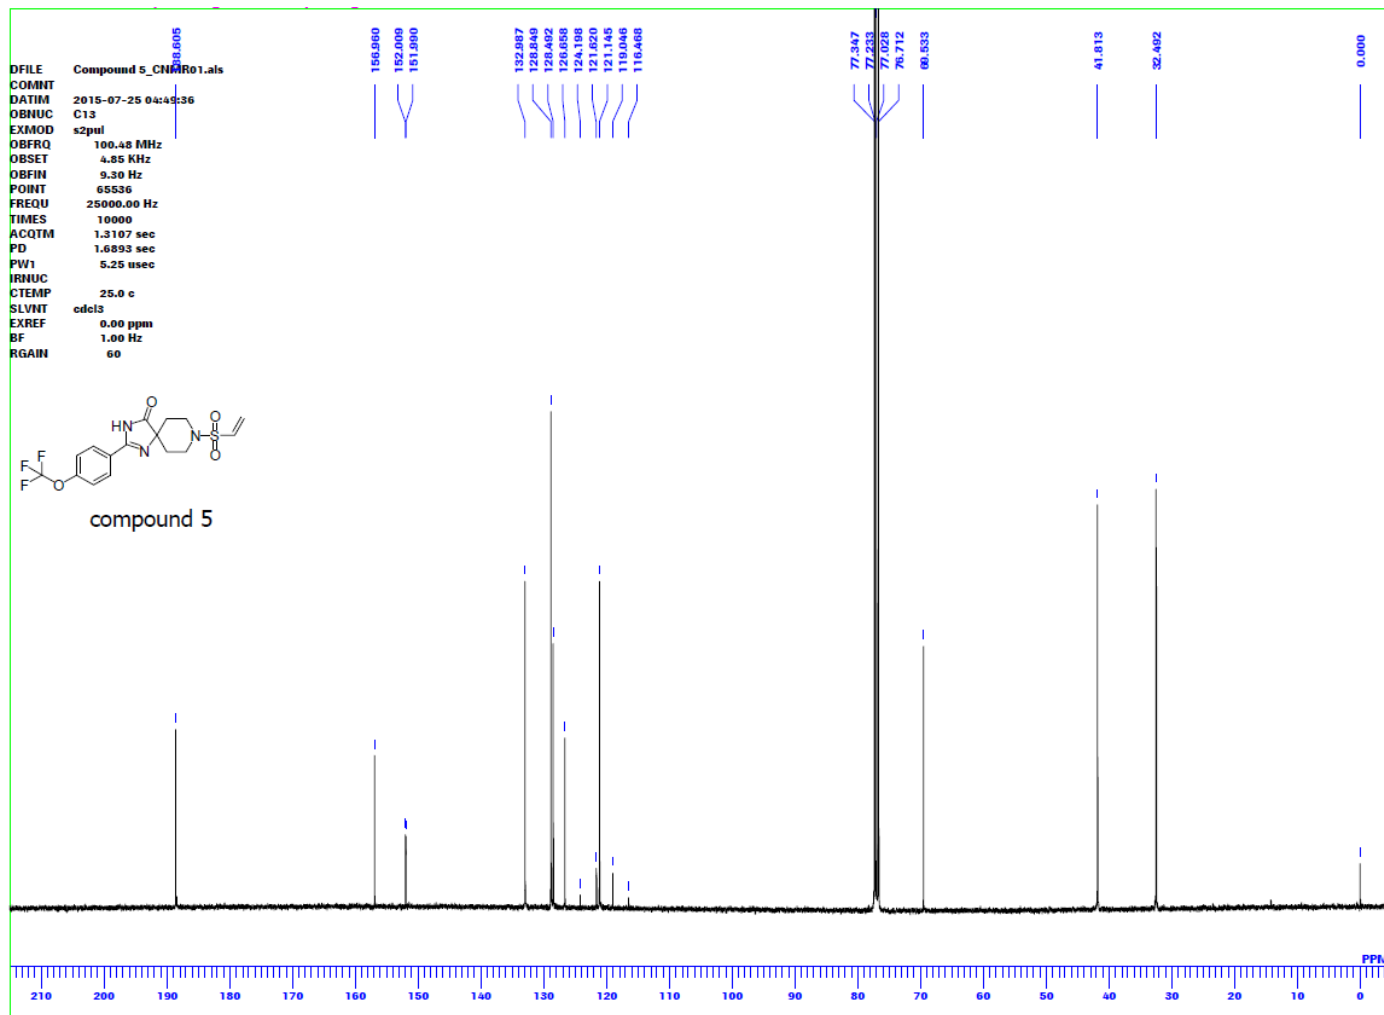

Supplementary Figure 13.  $^{13}\text{C}$ -NMR (100 MHz,  $\text{CDCl}_3$ ) spectrum of compound 5.

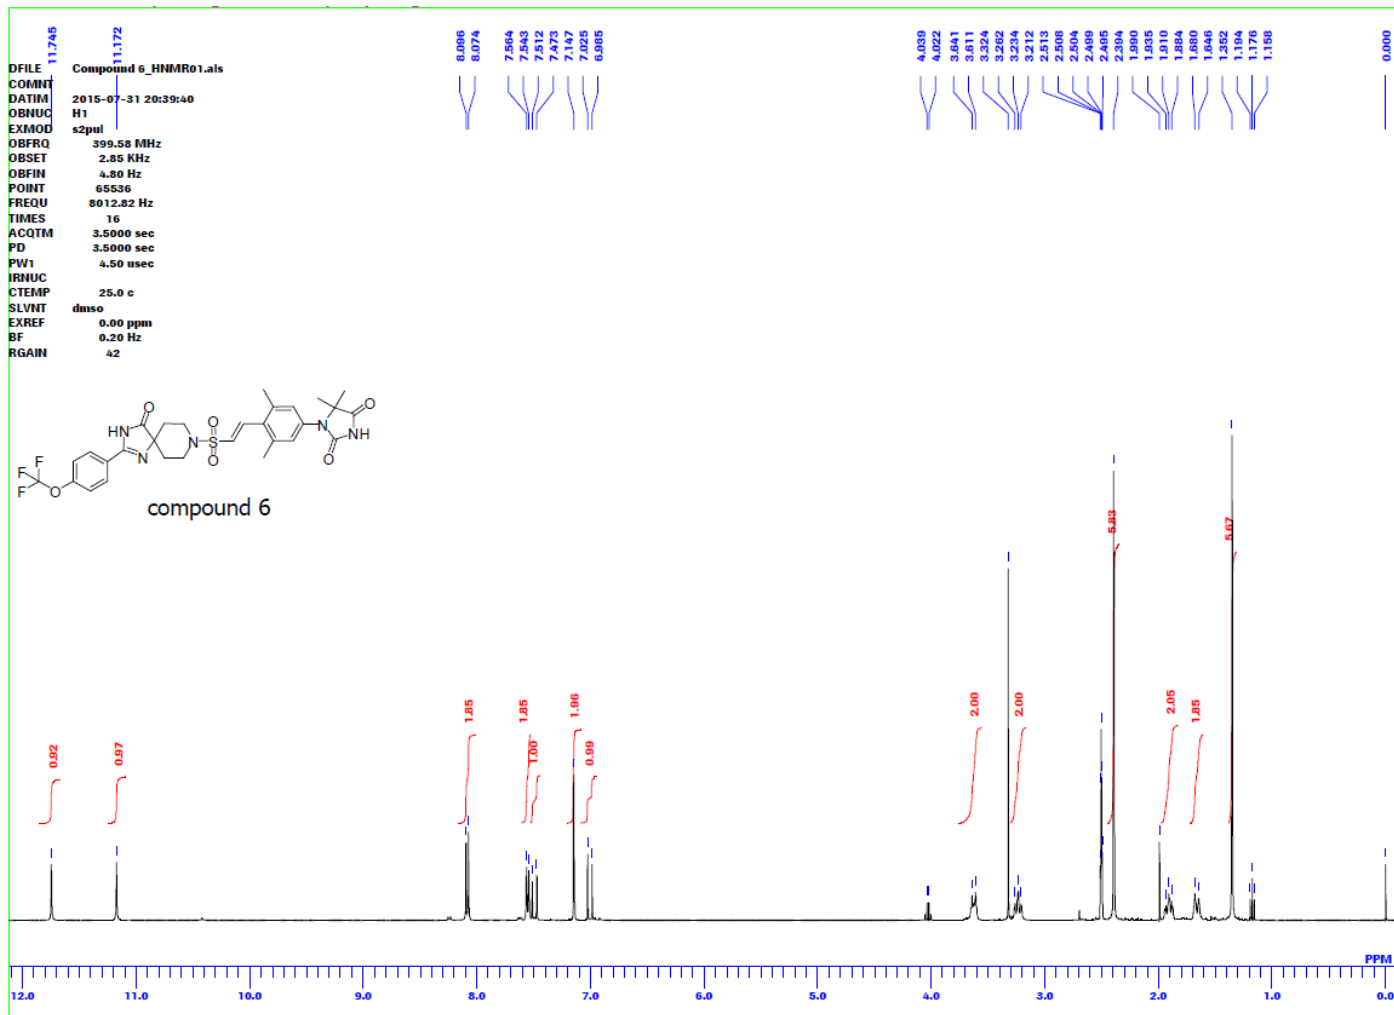

Supplementary Figure 14.  $^1\text{H-NMR}$  (400 MHz,  $\text{DMSO-d}_6$ ) spectrum of compound 6.

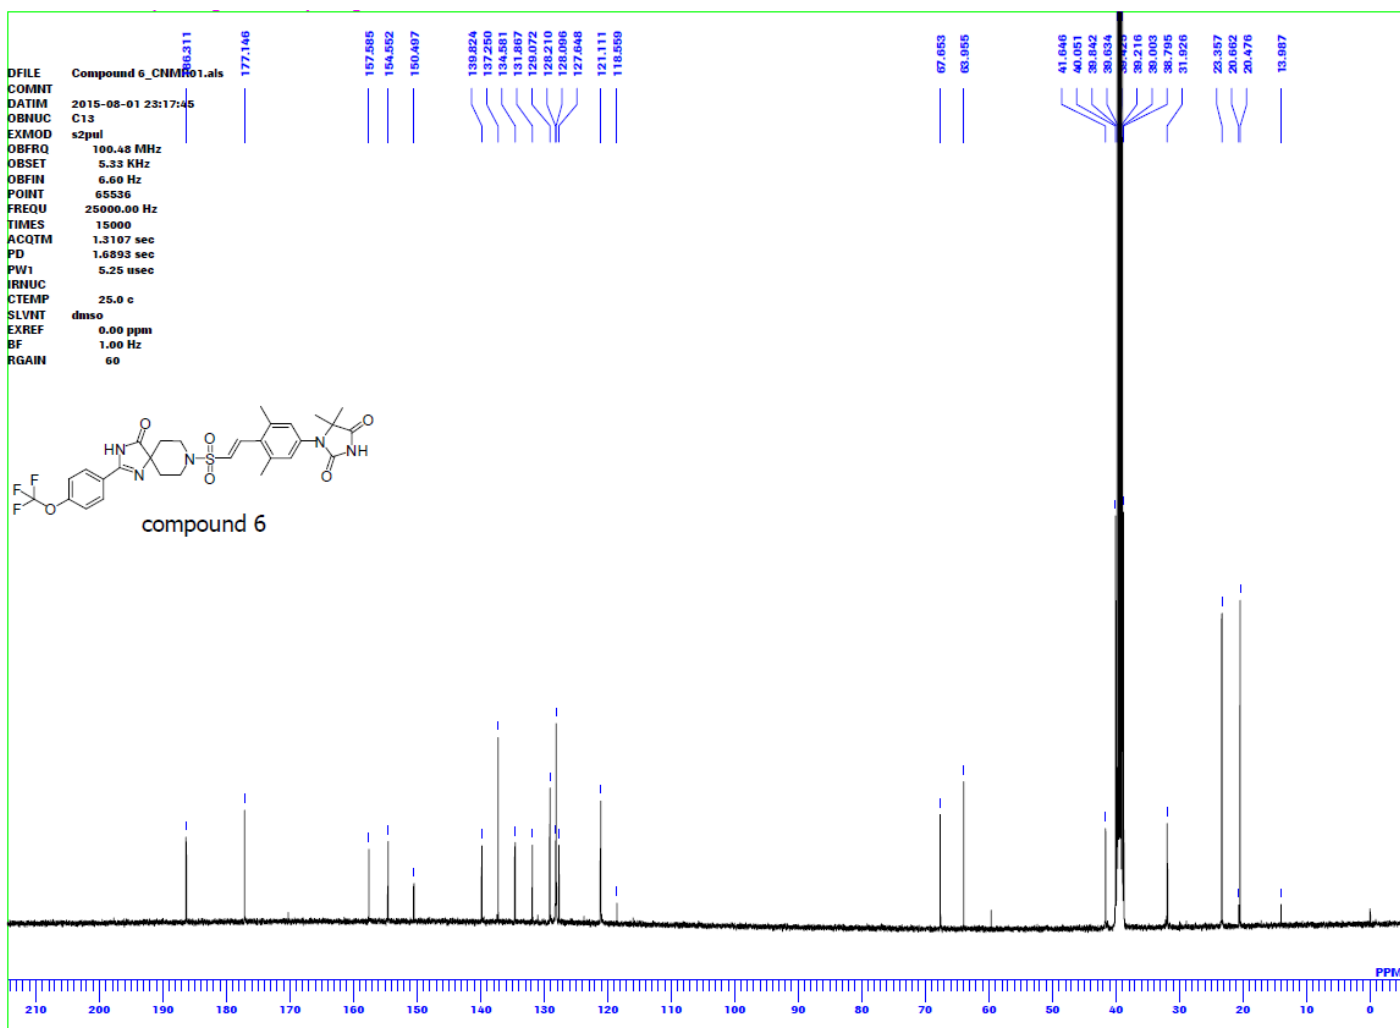

Supplementary Figure 15.  $^{13}\text{C}$ -NMR (100 MHz,  $\text{DMSO-d}_6$ ) spectrum of compound 6.



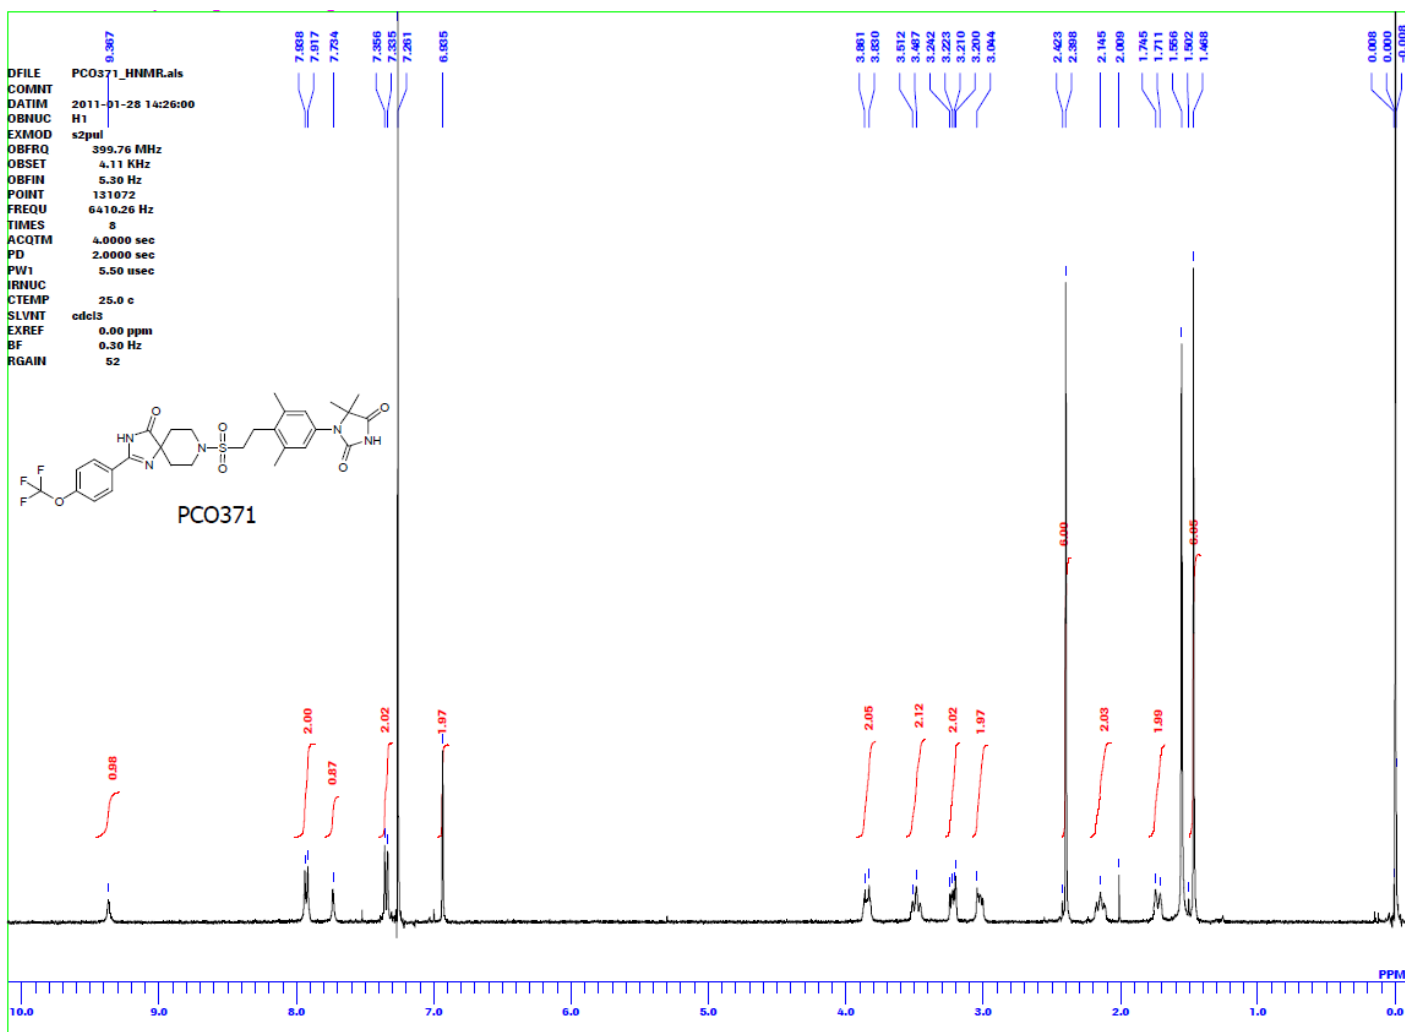

Supplementary Figure 16.  $^1\text{H-NMR}$  (400 MHz,  $\text{CDCl}_3$ ) spectrum of PCO371.

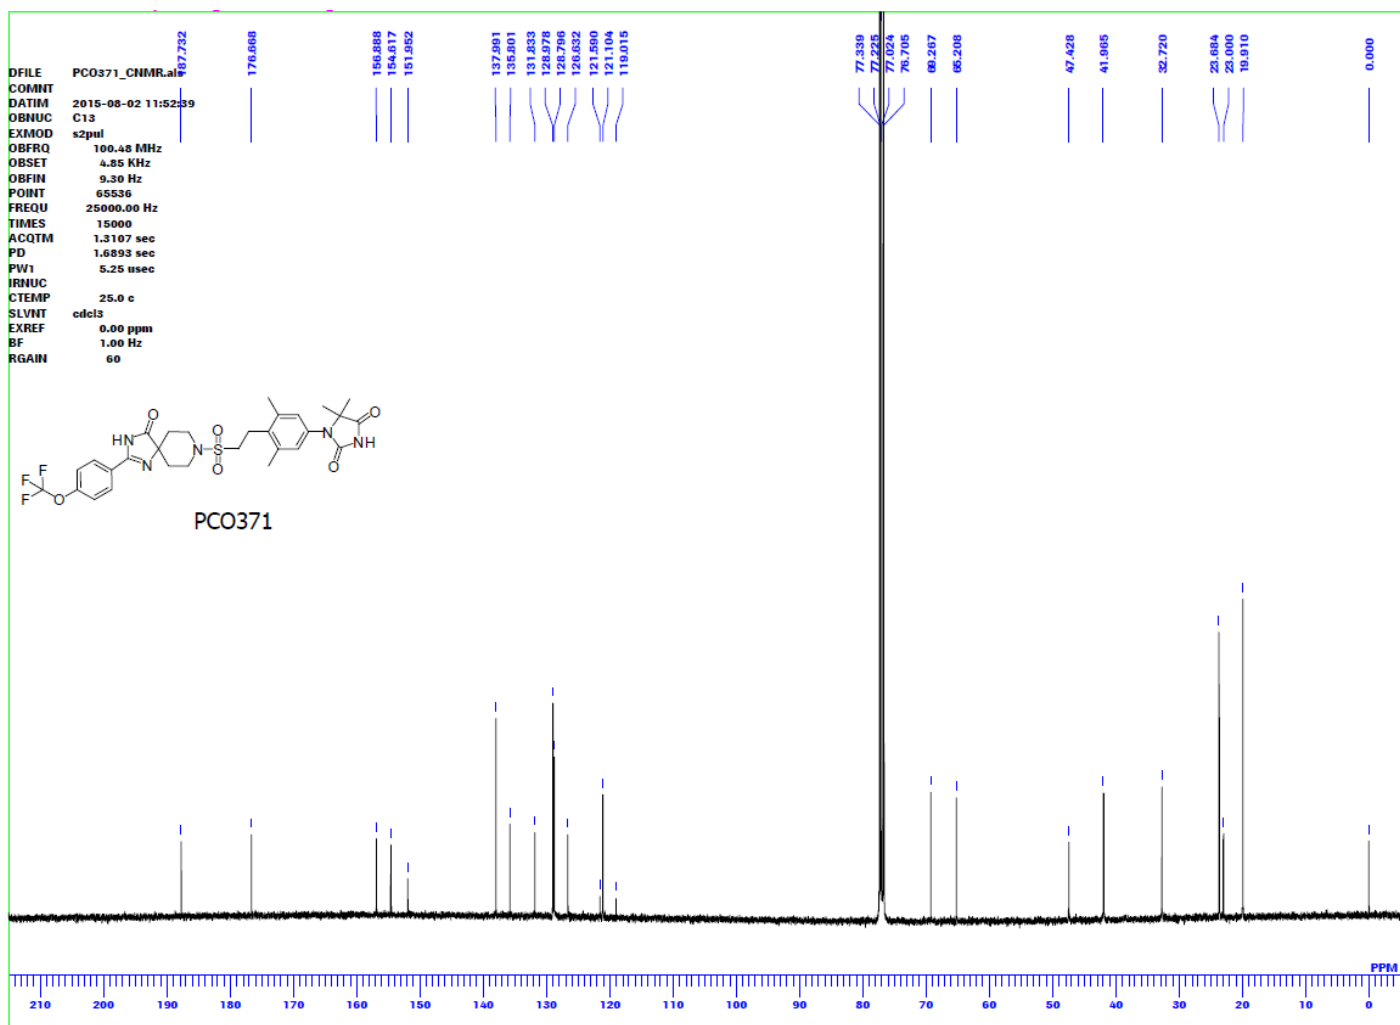

Supplementary Figure 17.  $^{13}\text{C}$ -NMR (100 MHz,  $\text{CDCl}_3$ ) spectrum of PCO371.

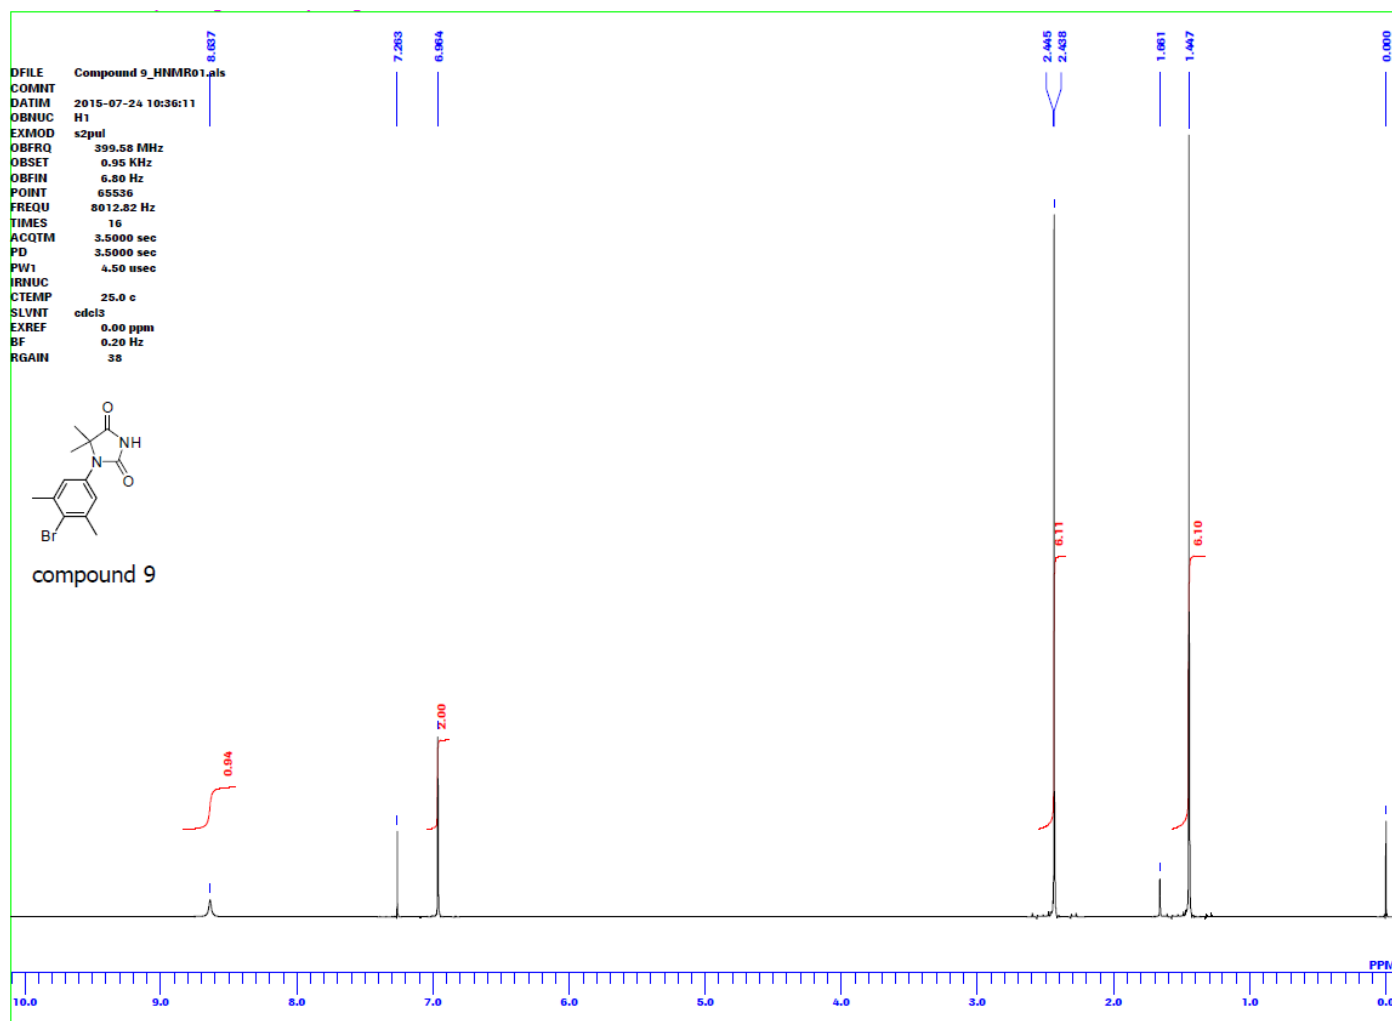

Supplementary Figure 18.  $^1\text{H-NMR}$  (400 MHz,  $\text{CDCl}_3$ ) spectrum of compound 9.

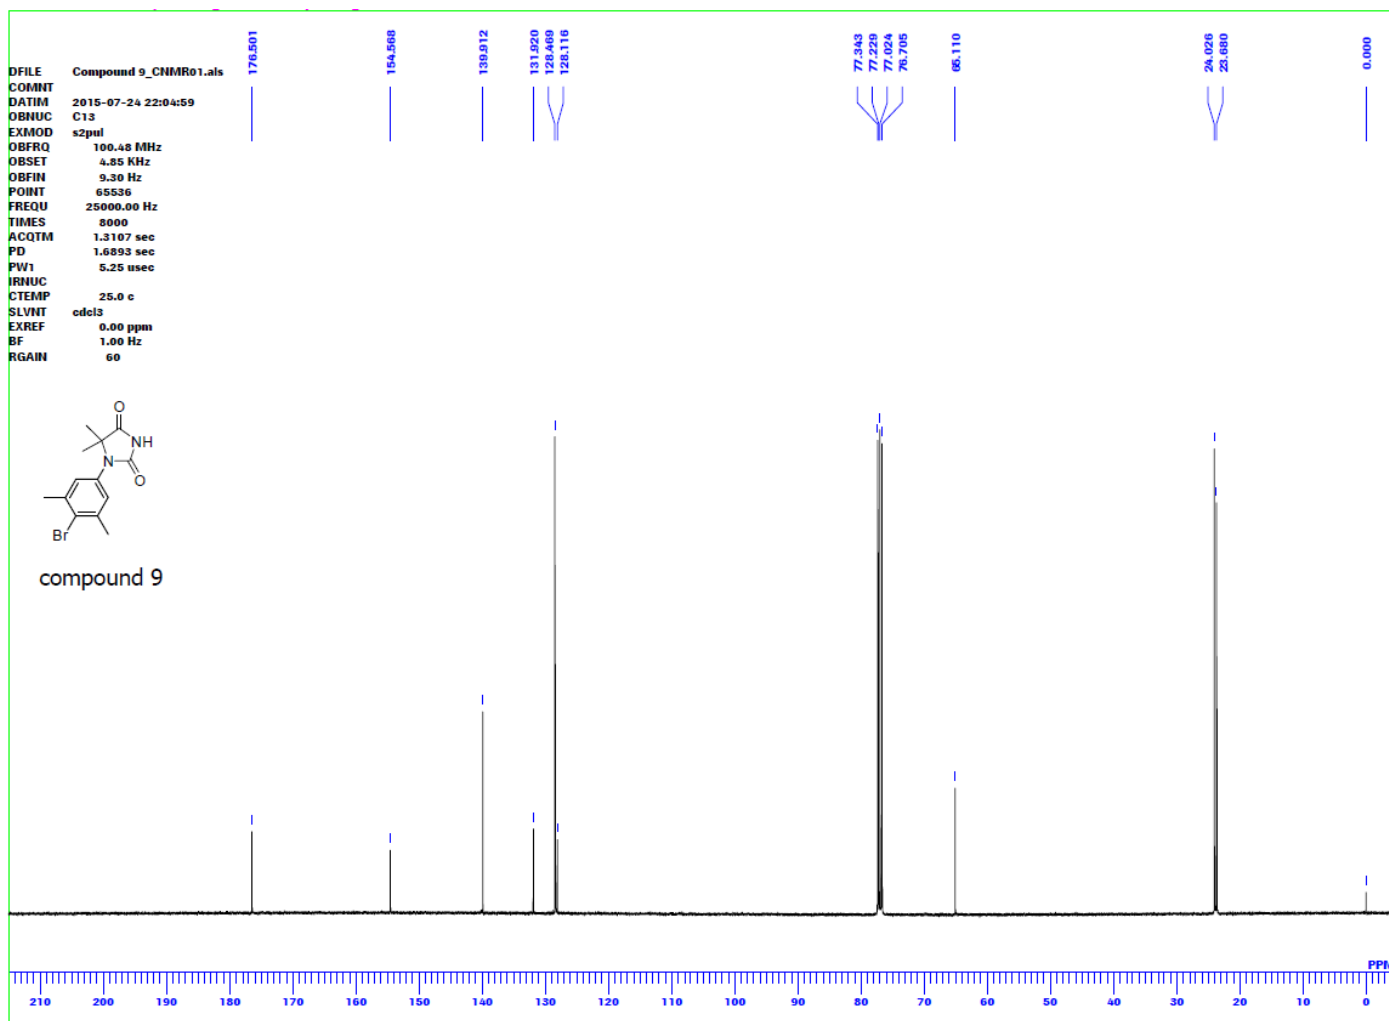

Supplementary Figure 19.  $^{13}\text{C}$ -NMR (100 MHz,  $\text{CDCl}_3$ ) spectrum of compound 9.

**Supplementary Table 1. Agonistic and antagonistic effects of PCO371 on class B GPCRs**

| GPCR              | Agonist effect   |                                             |                         |     | Antagonist effect           |                                             |                                   |     |
|-------------------|------------------|---------------------------------------------|-------------------------|-----|-----------------------------|---------------------------------------------|-----------------------------------|-----|
|                   | Control agonist  | PCO371                                      |                         |     | Control antagonist          | PCO371                                      |                                   |     |
|                   |                  | EC <sub>50</sub><br>(nmol L <sup>-1</sup> ) | (% of control agonist)  |     |                             | IC <sub>50</sub><br>(nmol L <sup>-1</sup> ) | (% inhibition of control agonist) |     |
|                   |                  | 1 μmol L <sup>-1</sup>                      | 10 μmol L <sup>-1</sup> |     | 1 μmol L <sup>-1</sup>      | 10 μmol L <sup>-1</sup>                     |                                   |     |
| <b>CGRP</b>       | hCGRPalpha       | 0.18                                        | <25                     | <25 | hCGRPalpha(8-37)            | 12                                          | <25                               | <25 |
| <b>Calcitonin</b> | human calcitonin | 5.6                                         | <25                     | <25 | salmon calcitonin 8-32      | 26                                          | <25                               | <25 |
| <b>CRF1</b>       | ovine CRF        | 11, 12                                      | <25                     | <25 | astressin                   | 8.5, 5.1                                    | <25                               | <25 |
| <b>CRF2</b>       | human CRF        | 14                                          | <25                     | <25 | astressin                   | 14                                          | <25                               | <25 |
| <b>GLP-1</b>      | GLP-1-(7-34)     | 0.075, 0.13                                 | <25                     | <25 | excendin-3(9-39)            | 8                                           | <25                               | <25 |
| <b>GLP-2</b>      | GLP-2-(1-34)     | 0.077                                       | <25                     | <25 | -                           | n.d.                                        | <25                               | <25 |
| <b>Glucagon</b>   | glucagon         | 0.092                                       | <25                     | <25 | L168,049                    | 12,000                                      | <25                               | <25 |
| <b>Secretin</b>   | human secretin   | 0.075                                       | <25                     | <25 | -                           | n.d.                                        | <25                               | <25 |
| <b>GHRH</b>       | human GHRF(1-29) | 0.95                                        | <25                     | <25 | [N-Acetyl-Tyr1,D-Arg2]-GHRF | 2.5                                         | <25                               | <25 |
| <b>PAC1</b>       | PACAP1-38        | 0.11                                        | <25                     | <25 | PACAP6-38                   | 40                                          | <25                               | <25 |
| <b>VPAC1</b>      | VIP              | 0.36                                        | <25                     | <25 | VIP GRF8-27                 | 23                                          | <25                               | <25 |
| <b>VPAC2</b>      | VIP              | 0.89                                        | <25                     | <25 | VIP6-28                     | 25,000                                      | <25                               | <25 |

Results of assays for off-target activity of PCO371 against class B GPCRs. PCO371 (1 and 10 μmol L<sup>-1</sup>) did not show agonistic or antagonistic activity (defined as >25% activity of positive control) against any of the receptors tested, whereas the corresponding agonist or antagonist for each receptor responded at the EC<sub>50</sub> or IC<sub>50</sub> indicated. Antagonistic activity was measured in the presence of the control agonist indicated. NA: not applicable; NE: not evaluated. Data from one experiment.

**Supplementary Table 2. Pharmacokinetics profile in OVX rats**

|               | <b>Dose</b><br>(mg kg <sup>-1</sup> ) | <b>Route</b> | <b>T1/2</b><br>(hour) | <b>Tmax</b><br>(hour) | <b>Cmax</b><br>(ng mL <sup>-1</sup> ) | <b>C2min</b><br>(ng mL <sup>-1</sup> ) | <b>AUC</b><br>(ng h mL <sup>-1</sup> ) |
|---------------|---------------------------------------|--------------|-----------------------|-----------------------|---------------------------------------|----------------------------------------|----------------------------------------|
|               | 30                                    | p.o.         | 2.5 ± 0.3             | 1.4 ± 0.8             | 95.6 ± 84.4                           | NE                                     | 29,500 ± 17,800                        |
| <b>PCO371</b> | 3                                     | i.v.         | 2.4 ± 0.2             | NE                    | NE                                    | 17,500 ± 2,330                         | 15,500 ± 2,820                         |
|               | 10                                    | i.v.         | 2.2 ± 0.2             | NE                    | NE                                    | 50,100 ± 6,910                         | 48,700 ± 8,620                         |

OVX rats were treated with a single subcutaneous or a single oral administration of PCO371. Blood samples were collected at 2 min (i.v. only), 15, 30 min, and 1, 2, 4, 8, and 24 h, and pharmacokinetics parameters were determined. C2min: Concentration at 2 min after administration. Data are represented as the mean ± s.d. of one experiment ( $n=10$  for 10 mg kg<sup>-1</sup> PCO371,  $n=11$  for 3 and 30 mg kg<sup>-1</sup> PCO371). NE: not evaluated.

**Supplementary Table 3. Bone histomorphometry of lumbar vertebra (L2) in OVX rats**

|                                                                 | Sham          |  | OVX             |  |                             |                            |                             |                                |                   |  |
|-----------------------------------------------------------------|---------------|--|-----------------|--|-----------------------------|----------------------------|-----------------------------|--------------------------------|-------------------|--|
|                                                                 | Vehicle       |  | Vehicle         |  | PCO371                      |                            |                             | PTH(1-34)                      |                   |  |
|                                                                 |               |  |                 |  | p.o. 30 mg kg <sup>-1</sup> | i.v. 3 mg kg <sup>-1</sup> | i.v. 10 mg kg <sup>-1</sup> | s.c. 0.9 nmol kg <sup>-1</sup> |                   |  |
| <b>BV/TV</b><br>(%)                                             | 30.4 ± 1.6    |  | 17.5 ± 1.3 #    |  | 20.1 ± 1.4                  | 23.2 ± 1.9 *               | 20.1 ± 1.1                  |                                | 34.6 ± 1.8 ***    |  |
| <b>Tb. Th</b><br>(µm)                                           | 77.5 ± 4.4    |  | 61.2 ± 2.4 #    |  | 76.0 ± 3.1 *                | 75.1 ± 4.1 *               | 79.2 ± 2.7 *                |                                | 99.4 ± 3.5 ***    |  |
| <b>Tb. N</b><br>(N per mm)                                      | 3.95 ± 0.15   |  | 2.85 ± 0.15 #   |  | 2.64 ± 0.14                 | 3.07 ± 0.18                | 2.54 ± 0.11                 |                                | 3.47 ± 0.12 **    |  |
| <b>Tb. Sp</b><br>(µm)                                           | 178 ± 8       |  | 301 ± 20 #      |  | 315 ± 24                    | 264 ± 24                   | 322 ± 18                    |                                | 193 ± 12 ***      |  |
| <b>ObS/BS</b><br>(%)                                            | 4.05 ± 0.77   |  | 15.09 ± 1.09 #  |  | 25.14 ± 2.09 ***            | 14.98 ± 1.07               | 24.64 ± 2.70 **             |                                | 17.00 ± 1.65      |  |
| <b>N.Ob/BS</b><br>(N per mm)                                    | 3.67 ± 0.65   |  | 11.39 ± 0.78 #  |  | 17.55 ± 1.43 **             | 11.36 ± 0.71               | 16.09 ± 1.72 *              |                                | 12.65 ± 1.04      |  |
| <b>MAR</b><br>(µm per day)                                      | 1.48 ± 0.11   |  | 2.01 ± 0.03 #   |  | 2.28 ± 0.08 **              | 1.84 ± 0.07                | 2.22 ± 0.06 *               |                                | 2.04 ± 0.05       |  |
| <b>BFR/BS</b><br>(mm <sup>3</sup> per mm <sup>2</sup> per year) | 0.029 ± 0.007 |  | 0.134 ± 0.012 # |  | 0.285 ± 0.023 ***           | 0.144 ± 0.013              | 0.275 ± 0.022 ***           |                                | 0.224 ± 0.012 *** |  |
| <b>OV/TV</b><br>(%)                                             | 0.146 ± 0.030 |  | 0.433 ± 0.033 # |  | 0.794 ± 0.085 ***           | 0.465 ± 0.040              | 0.690 ± 0.076 *             |                                | 0.662 ± 0.055 *   |  |
| <b>ES/BS</b><br>(%)                                             | 14.5 ± 2.0    |  | 28.3 ± 2.4 #    |  | 39.7 ± 1.6 ***              | 27.6 ± 2.5                 | 33.0 ± 1.6                  |                                | 20.5 ± 1.6 *      |  |
| <b>OcS/BS</b><br>(%)                                            | 4.28 ± 0.51   |  | 8.79 ± 0.95 #   |  | 13.60 ± 0.69 ***            | 8.49 ± 0.79                | 11.69 ± 0.70 *              |                                | 6.13 ± 0.58 *     |  |
| <b>N.Oc/BS</b><br>(N per mm)                                    | 1.59 ± 0.22   |  | 2.92 ± 0.29 #   |  | 4.30 ± 0.27 ***             | 2.55 ± 0.22                | 3.60 ± 0.20                 |                                | 1.87 ± 0.19 *     |  |
| <b>BRs.R</b><br>(mm <sup>2</sup> per mm <sup>2</sup> per year)  | 0.011 ± 0.002 |  | 0.036 ± 0.004 # |  | 0.057 ± 0.006 *             | 0.039 ± 0.005              | 0.071 ± 0.008 ***           |                                | 0.068 ± 0.005 *** |  |

Effects of PCO371 and hPTH(1–34) on bone histomorphometry parameters of the cancellous bone of lumbar vertebra (L1) in OVX rats. BV/TV = Bone volume/Tissue volume. Tb.Th = Trabecular thickness. Tb.N = Trabecular number. Tb.Sp = Trabecular separation. Ob.S/BS = Osteoblast surface/Bone surface. N.Ob/BS = Number of osteoblasts/Bone surface. MAR = Mineral apposition rate. BFR/BS = Bone formation rate/Bone surface. OV/TV = Osteoid volume/Tissue volume. ES/BS = Eroded surface/Bone surface. Oc.S/BS = Osteoclast surface/Bone surface. N.Oc/BS = Number of osteoclasts/Bone surface. PCO371 30 mg kg<sup>-1</sup> (p.o.) and 10 mg kg<sup>-1</sup> (i.v.) are exposure-matched dose settings. Data are represented as the mean ± s.e.m. (*n*=9–12) of one experiment. Student's *t*-test was used to compare the sham and the OVX control groups; #: *P*<0.05. Parametric Dunnett's test was used to compare each OVX treated group with the OVX control group; \*: *P*<0.05, \*\*: *P*<0.01, \*\*\*: *P*<0.001.

**Supplementary Table 4. Pharmacokinetics profile in TPTX rats**

|                                                    | <b>Route</b> | <b>Dose</b> | <b>T<sub>1/2</sub></b><br>(h) | <b>T<sub>max</sub></b><br>(h) | <b>C<sub>max</sub></b><br>(ng mL <sup>-1</sup> ) | <b>AUC</b><br>(ng h mL <sup>-1</sup> ) |
|----------------------------------------------------|--------------|-------------|-------------------------------|-------------------------------|--------------------------------------------------|----------------------------------------|
| <b>hPTH(1-84)</b><br><b>(nmol kg<sup>-1</sup>)</b> | s.c.         | 30          | 0.2 ± 0.1                     | 0.2 ± 0.2                     | 3.42 ± 1.10                                      | 1.80 ± 0.78                            |
|                                                    |              | 100         | 1.7 ± 2.2                     | 0.1 ± 0.1                     | 8.67 ± 1.97                                      | 8.55 ± 4.63                            |
|                                                    |              | 300         | 1.1 ± 0.9                     | 0.1 ± 0.1                     | 39.7 ± 10.3                                      | 21.0 ± 5.58                            |
| <b>PCO371</b><br><b>(mg kg<sup>-1</sup>)</b>       | p.o.         | 2           | 6.9 ± 2.3                     | 1.4 ± 1.0                     | 95.6 ± 84.4                                      | 464 ± 125                              |
|                                                    |              | 6           | 4.9 ± 0.6                     | 1.3 ± 0.6                     | 216 ± 103                                        | 1,590 ± 890                            |
|                                                    |              | 18          | 4.7 ± 0.7                     | 3.7 ± 3.8                     | 1,630 ± 1,740                                    | 9,210 ± 8,080                          |

Pharmacokinetic parameters of PCO371 and hPTH(1–84) in TPTX rats. Rats were treated with a single subcutaneous injection of hPTH(1–84) or a single oral administration of PCO371. Blood samples were collected at 3, 10, 15, 30, and 45 min and at 1, 2, and 4 h for hPTH(1–84) or at 15 and 30 min, and 1, 2, 4, 8, and 24 h for PCO371, and pharmacokinetics parameters were determined. Data are represented as the mean ± s.d. of one experiment ( $n=3$  for PCO371,  $n=5$  for hPTH(1–84)).
